# Supplementary material for: Socioeconomic status and prevalence of type 2 diabetes in mainland China, Hong Kong and Taiwan: a systematic review
Source: PubMed Central journal article supplement (PMC5481892; doi:10.7189/jogh.07.011103), 2017-06
Supplement: jogh-07-011103-s001.pdf [file jogh-07-011103-s001.pdf]

## Online Supplementary Document

Wu et al. Socioeconomic status and prevalence of type 2 diabetes in mainland China, Hong Kong and Taiwan: a systematic review

J Glob Health 2017;7:011103

### Appendix S1. PRISMA Checklist

| Section/topic             | # | Checklist item                                                                                                                                                                                                                                                                                              | Reported |
|---------------------------|---|-------------------------------------------------------------------------------------------------------------------------------------------------------------------------------------------------------------------------------------------------------------------------------------------------------------|----------|
| <b>TITLE</b>              |   |                                                                                                                                                                                                                                                                                                             |          |
| Title                     | 1 | Identify the report as a systematic review, meta-analysis, or both.                                                                                                                                                                                                                                         | Yes      |
| <b>ABSTRACT</b>           |   |                                                                                                                                                                                                                                                                                                             |          |
| Structured summary        | 2 | Provide a structured summary including, as applicable: background; objectives; data sources; study eligibility criteria, participants, and interventions; study appraisal and synthesis methods; results; limitations; conclusions and implications of key findings; systematic review registration number. | Yes      |
| <b>INTRODUCTION</b>       |   |                                                                                                                                                                                                                                                                                                             |          |
| Rationale                 | 3 | Describe the rationale for the review in the context of what is already known.                                                                                                                                                                                                                              | Yes      |
| Objectives                | 4 | Provide an explicit statement of questions being addressed with reference to participants, interventions, comparisons, outcomes, and study design (PICOS).                                                                                                                                                  | Yes      |
| <b>METHODS</b>            |   |                                                                                                                                                                                                                                                                                                             |          |
| Protocol and registration | 5 | Indicate if a review protocol exists, if and where it can be accessed (e.g., Web address), and, if available, provide registration information including registration number.                                                                                                                               | Yes      |

|                                    |    |                                                                                                                                                                                                                        |     |
|------------------------------------|----|------------------------------------------------------------------------------------------------------------------------------------------------------------------------------------------------------------------------|-----|
| Eligibility criteria               | 6  | Specify study characteristics (e.g., PICOS, length of follow-up) and report characteristics (e.g., years considered, language, publication status) used as criteria for eligibility, giving rationale.                 | Yes |
| Information sources                | 7  | Describe all information sources (e.g., databases with dates of coverage, contact with study authors to identify additional studies) in the search and date last searched.                                             | Yes |
| Search                             | 8  | Present full electronic search strategy for at least one database, including any limits used, such that it could be repeated.                                                                                          | Yes |
| Study selection                    | 9  | State the process for selecting studies (i.e., screening, eligibility, included in systematic review, and, if applicable, included in the meta-analysis).                                                              | Yes |
| Data collection process            | 10 | Describe method of data extraction from reports (e.g., piloted forms, independently, in duplicate) and any processes for obtaining and confirming data from investigators.                                             | Yes |
| Data items                         | 11 | List and define all variables for which data were sought (e.g., PICOS, funding sources) and any assumptions and simplifications made.                                                                                  | Yes |
| Risk of bias in individual studies | 12 | Describe methods used for assessing risk of bias of individual studies (including specification of whether this was done at the study or outcome level), and how this information is to be used in any data synthesis. | Yes |
| Summary measures                   | 13 | State the principal summary measures (e.g., risk ratio, difference in means).                                                                                                                                          | Yes |
| Synthesis of results               | 14 | Describe the methods of handling data and combining results of studies, if done, including measures of consistency (e.g., $I^2$ ) for each meta-analysis.                                                              | Yes |
| Risk of bias across studies        | 15 | Specify any assessment of risk of bias that may affect the cumulative evidence (e.g., publication bias, selective reporting within studies).                                                                           | No  |
| Additional analyses                | 16 | Describe methods of additional analyses (e.g., sensitivity or subgroup analyses, meta-regression), if done, indicating which were pre-specified.                                                                       | No  |
| <b>RESULTS</b>                     |    |                                                                                                                                                                                                                        |     |
| Study selection                    | 17 | Give numbers of studies screened, assessed for eligibility, and included in the review, with reasons for exclusions at each stage, ideally with a flow diagram.                                                        | Yes |
| Study characteristics              | 18 | For each study, present characteristics for which data were extracted (e.g., study size, PICOS, follow-up period) and provide the citations.                                                                           | Yes |
| Risk of bias within studies        | 19 | Present data on risk of bias of each study and, if available, any outcome level assessment (see item 12).                                                                                                              | Yes |

|                               |    |                                                                                                                                                                                                          |     |
|-------------------------------|----|----------------------------------------------------------------------------------------------------------------------------------------------------------------------------------------------------------|-----|
| Results of individual studies | 20 | For all outcomes considered (benefits or harms), present, for each study: (a) simple summary data for each intervention group (b) effect estimates and confidence intervals, ideally with a forest plot. | Yes |
| Synthesis of results          | 21 | Present results of each meta-analysis done, including confidence intervals and measures of consistency.                                                                                                  | Yes |
| Risk of bias across studies   | 22 | Present results of any assessment of risk of bias across studies (see Item 15).                                                                                                                          | No  |
| Additional analysis           | 23 | Give results of additional analyses, if done (e.g., sensitivity or subgroup analyses, meta-regression [see Item 16]).                                                                                    | No  |
| <b>DISCUSSION</b>             |    |                                                                                                                                                                                                          |     |
| Summary of evidence           | 24 | Summarize the main findings including the strength of evidence for each main outcome; consider their relevance to key groups (e.g., healthcare providers, users, and policy makers).                     | Yes |
| Limitations                   | 25 | Discuss limitations at study and outcome level (e.g., risk of bias), and at review-level (e.g., incomplete retrieval of identified research, reporting bias).                                            | Yes |
| Conclusions                   | 26 | Provide a general interpretation of the results in the context of other evidence, and implications for future research.                                                                                  | Yes |
| <b>FUNDING</b>                |    |                                                                                                                                                                                                          |     |
| Funding                       | 27 | Describe sources of funding for the systematic review and other support (e.g., supply of data); role of funders for the systematic review.                                                               | Yes |

From: Moher D, Liberati A, Tetzlaff J, Altman DG, The PRISMA Group (2009). Preferred Reporting Items for Systematic Reviews and Meta-Analyses: The PRISMA Statement. PLoS Med 6(7): e1000097. doi:10.1371/journal.pmed1000097

For more information, visit: [www.prisma-statement.org](http://www.prisma-statement.org).

## **Appendix S2. Systematic review search terms**

### **Medline (Ovid, 1946 to May Week 1 2016)**

- 1 socioeconomic status.mp. or Social Class/
- 2 Socioeconomic Factors/ or Social Class/ or social position.mp.
- 3 Income/ or income.mp.
- 4 Education/ or education.mp.
- 5 occupation.mp. or Occupations/
- 6 1 or 2 or 3 or 4 or 5
- 7 China.mp. or China/
- 8 hongkong.mp or Hong Kong/
- 9 Taiwan.mp or Taiwan/
- 10 7 or 8 or 9
- 11 diabetes.mp. or Diabetes Mellitus, Type 2/ or Diabetes Mellitus/
- 12 6 and 10 and 11

### **Embase (1980 to 2016 Week 19)**

- 1 socioeconomic status.mp. or social status/
- 2 social class.mp. or social class/
- 3 social status/ or social class/ or social position.mp. or socioeconomics/
- 4 income.mp. or income/
- 5 education.mp. or education/
- 6 occupation/ or occupation.mp.
- 7 1 or 2 or 3 or 4 or 5 or 6
- 8 China.mp. or China/
- 9 hongkong.mp or Hong Kong/
- 10 taiwan.mp. or Taiwan/
- 11 8 or 9 or 10
- 12 diabetes.mp. or diabetes mellitus/
- 13 7 and 11 and 12

### **Global Health (1973 to 2016 Week 17)**

- 1 socioeconomic status.mp. or socioeconomic status/
- 2 social class.mp. or social classes/
- 3 social position.mp. or socioeconomic status.sh. or social classes.sh.
- 4 socioeconomic factors.mp. or socioeconomic status.sh. or socioeconomics.sh.
- 5 income/ or income.mp.
- 6 education/ or education.mp.
- 7 occupation.mp. or occupations/
- 8 1 or 2 or 3 or 4 or 5 or 6 or 7
- 9 china.mp. or China/
- 10 hongkong.mp or China.gl. or Hong Kong.gl.
- 11 Taiwan/ or Taiwan.mp.
- 12 9 or 10 or 11
- 13 diabetes.mp. or diabetes/ or diabetes mellitus/ or type 2 diabetes/

14 8 and 12 and 13

### **Appendix S3. Criteria list for the assessment of study quality based on modified Newcastle-Ottawa Scale for cohort studies**

#### **Selection:** (Maximum 3 scores)

##### 1) Representativeness of the sample:

- a) Truly representative of the average in the target population (all subjects or random sampling or from linkage database) (1 score)
- b) Somewhat representative of the average in the target population (non-random sampling)
- c) Selected group of users
- d) No description of the sampling strategy

##### 2) Description of sample:

- a) Study year, sample size, and age clearly described (1 score)
- b) No description or not clearly described

##### 3) Ascertainment of the exposure:

- a) The ascertainment of SES exposure clearly described (1 score)
- b) No description or not clearly described

#### **Comparability:** (Maximum 2 scores)

- 1) Confounding factors are controlled (No paper reporting both standardized prevalence and adjusted odds ratio)
  - a) Report both crude prevalence and adjusted odds ratio (2 scores)
  - b) Report standardized prevalence or adjusted odds ratio (1 score)
  - c) Report either of crude prevalence or crude odds ratio

#### **Outcome:** (Maximum 3 scores)

##### 1) Assessment of the outcome:

- a) Laboratory test (2 scores)
- b) Record linkage (2 scores)
- c) Self report (1 score)
- d) No description

##### 2) Statistical test:

- a) Report confidence intervals or the probability level (p value) for prevalence or odds ratio of type 2 diabetes for population with different SES (1 score)
- b) Neither confidence intervals nor the probability level (p value) are given.

**Table S4: Findings of studies identified in systematic review reporting association between prevalence of type 2 diabetes and education in mainland China, Hong Kong and Taiwan**

| Study                  | Education               | Adjustment                                                                                                                  |                                                                                                     | Prevalence (95% CI, %)                                                    |                                                 |                                                 | P-value                                                              |            |
|------------------------|-------------------------|-----------------------------------------------------------------------------------------------------------------------------|-----------------------------------------------------------------------------------------------------|---------------------------------------------------------------------------|-------------------------------------------------|-------------------------------------------------|----------------------------------------------------------------------|------------|
|                        |                         |                                                                                                                             |                                                                                                     | Total                                                                     | Men                                             | Women                                           |                                                                      |            |
| Wu et al. 2016 [51]    | Highest level completed | 2006 China population age standardized                                                                                      | Primary or below:<br>Secondary:<br>Matriculation or above:                                          | 4.1 (3.7,4.5)<br>4.8 (4.2,5.4)<br>4.6 (4.1,5.1)                           | 4.3 (3.7,4.9)<br>5.5 (4.6,6.4)<br>5.8 (5.1,6.5) | 3.9 (3.4,4.4)<br>4.2 (3.4,5.0)<br>3.1 (2.6,3.6) | p<0.05 <sup>a</sup> in all groups; p>0.05 <sup>b</sup> in all groups |            |
| Yu et al. 2015 [74]    | Highest level completed | 6 <sup>th</sup> China national population census, Jilin province population standardized (standardized for various factors) | Junior school:<br>Junior high school:<br>High school:<br>Undergraduate:                             | 12.6 (11.6,13.7)<br>7.4 (6.7,8.3)<br>7.9 (7.0,8.9)<br>4.7 (3.9,5.6)       |                                                 |                                                 | p<0.001 <sup>a</sup>                                                 |            |
| Xu et al. 2015 [52]    | School years completed  | 6 <sup>th</sup> China national population census age standardized                                                           | 0 years:<br>1-9 years:<br>≥ 10 years:                                                               | 5.4<br>9.2<br>8.8                                                         | 6.6<br>9.1<br>9.8                               | 4.5<br>11.9<br>11.6                             | p<0.05 <sup>b</sup> in total population and men                      |            |
| Hu et al. 2009 [63]    | Highest level completed | 2000 China population census standardized (standardized for various factors)                                                | Less than high school:<br>High school or higher:                                                    | 5.55<br>5.28                                                              |                                                 |                                                 | p>0.05 <sup>a</sup>                                                  |            |
| Cai et al. 2013 [40]   | Highest level completed | Crude                                                                                                                       | Illiterate:<br>Primary school:<br>Middle school or higher:                                          | 9.2 (8.2,10.2)<br>6.1 (5.2,7.0)<br>4.5 (3.8,5.2)                          |                                                 |                                                 | p<0.01 <sup>a</sup> , CI calculated from raw data                    |            |
| Shi et al. 2011 [41]   | Highest level completed | Crude                                                                                                                       | Primary:<br>Junior school:<br>High school:<br>University:                                           | 2.36 (1.55,3.16)<br>3.09 (2.04,4.15)<br>3.16 (1.40,4.92)<br>3.90 (0.8,25) |                                                 |                                                 | p=0.616 <sup>a</sup> , CI calculated from raw data                   |            |
| Lin et al. 2011 [42]   | Highest level completed | Crude                                                                                                                       | Elementary school and below:<br>Junior and senior high school:<br>College/university and above:     | 19.61 (16.35,22.87)<br>11.10 (9.10,13.09)<br>8.19 (6.29,10.08)            |                                                 |                                                 | p<0.001 <sup>a</sup> , CI calculated from raw data                   |            |
| Liu et al. 2016 [38]   | School years completed  | Crude                                                                                                                       | 0-6 years:<br>>7 years:                                                                             | 21.8 (19.2,24.4)<br>21.1 (18.9,23.3)                                      | 10.9 (8.3,13.4)<br>30.1 (27.8,32.4)             |                                                 | No p-value, CI calculated from raw data                              |            |
| Bragg et al. 2014 [35] | Highest level completed | Age and study area structure of the study population standardized                                                           | No formal schooling:<br>Primary school:<br>Middle school:<br>High school:<br>College or university: | 2.8<br>2.7<br>3.3<br>3.5<br>4.1                                           | 3.4<br>3.6<br>4.0<br>3.8                        | 4.1<br>2.9<br>2.8<br>2.9<br>2.7                 | 3.8<br>3.2<br>2.8<br>2.4<br>2.0                                      | No p-value |
| Xia et al. 2013 [39]   | Highest level completed | Crude                                                                                                                       | Lower than junior high school:<br>Junior high school and above:                                     | 5.70 (5.13,6.27)<br>4.84 (4.29,5.40)                                      |                                                 |                                                 | No p-value, CI calculated from raw data                              |            |
| Woo et al. 2003 [44]   | Highest level completed | Crude                                                                                                                       | Primary and lower:<br>Secondary:                                                                    | 9.32 (6.09,12.56)<br>4.60 (2.84,6.37)                                     |                                                 |                                                 | No p-value, CI calculated from raw data                              |            |

|                            |                            |       |                                 |                     |                                                   |
|----------------------------|----------------------------|-------|---------------------------------|---------------------|---------------------------------------------------|
|                            |                            |       | Post-secondary:                 | 3.76 (0.51,7.00)    |                                                   |
| Chou and Chi. 2005<br>[43] | Highest level<br>completed | Crude | None or some elementary school: | 14.08 (12.22,15.95) | p>0.05 <sup>a</sup> , CI calculated from raw data |
|                            |                            |       | Elementary graduates or above:  | 11.93 (9.05,14.82)  |                                                   |

<sup>a</sup> p-value for Chi-square test.

<sup>b</sup> p-value for trend Chi-square test.

**Table S5: Findings of studies identified in systematic review reporting odds ratio of type 2 diabetes for different education groups in mainland China, Hong Kong and Taiwan**

| Study                        | Education               | Adjustment                                                                                                                                                                                                                                        | Odds ratio (95% CI)                                                                                                                              |                                                                                                                                                                                                          |  | P-value                    |
|------------------------------|-------------------------|---------------------------------------------------------------------------------------------------------------------------------------------------------------------------------------------------------------------------------------------------|--------------------------------------------------------------------------------------------------------------------------------------------------|----------------------------------------------------------------------------------------------------------------------------------------------------------------------------------------------------------|--|----------------------------|
| Xue et al. 2015 [75]         | Highest level completed | Age, BMI, sex, marital status, income, alcohol consumption, smoking, cardiometabolic parameters and uric acid levels                                                                                                                              | Per level:                                                                                                                                       | 0.915 (0.785,1.066)                                                                                                                                                                                      |  | p=0.255                    |
| Wang et al. 2013 [77]        | Highest level completed | Age, sex, yearly household income, ethnicity, BMI, current smoking, current drinking, hypertensive, township mean yearly income, township percent primary education or higher, township population size, township percentage of ethnic minorities | Illiteracy:<br>Primary or above:                                                                                                                 | 1.00<br>0.95 (0.91,0.99)                                                                                                                                                                                 |  | p=0.027                    |
| Kavikondala et al. 2011 [36] | Highest level completed | Age, sex, study phase, WHR, BMI, maternal literacy by sex, maternal literacy by Childhood SEP and maternal literacy by late adult SEP                                                                                                             | Junior middle or lower:<br>Senior middle or higher:                                                                                              | 1.00<br>0.98 (0.78, 1.22)                                                                                                                                                                                |  | No p-value                 |
| Ning et al. 2009 [53]        | School years completed  | Age, waist circumference, family history of diabetes, hypertension, personal income, socioeconomic status, occupation, current smoking, current drinking, leisure time physical activity, survey years and resident districts                     | Urban areas<br>Men<br>Women<br>≤9 years:<br>10-12 years:<br>≥13 years:<br>Rural areas<br>Men<br>Women<br>≤9 years:<br>10-12 years:<br>≥13 years: | 1.00<br>0.97 (0.73,1.28)<br>0.80 (0.62,1.03)<br>0.79 (0.56,1.10)<br>0.92 (0.60,1.42)<br>1.00<br>0.82 (0.53,1.26)<br>0.92 (0.57,1.50)<br>1.00<br>0.82 (0.53,1.26)<br>0.92 (0.60,1.42)<br>0.48 (0.16,1.47) |  | No p-value                 |
| Chen et al. 2001 [49]        | Highest level completed | Age, sex, Fukiens, Hakaas, Aborigines, family history, BMI, employment, single, smoker, drinker, regular exercise, cholesterol, triglyceride and hypertension                                                                                     | Illiterate:<br>Literate:                                                                                                                         | 1.00<br>0.72 (0.47,1.11)                                                                                                                                                                                 |  | p>0.05                     |
| Zhou et al. 2015 [55]        | Highest level completed | Region, urban/SEC cross classification, sex/age cross classification, health literacy, time since health check, minor psychiatric morbidity, weight status, number of unhealthy lifestyles, economic status, couple status and living alone       | None:<br>Primary:<br>Secondary:<br>University:                                                                                                   | 1.00<br>1.00 (0.95,1.05)<br>0.93 (0.87,0.99)<br>0.92 (0.83,1.01)                                                                                                                                         |  | p>0.05<br>p<0.05<br>p>0.05 |
| Bu et al. 2015 [76]          | Highest level completed | Sex, family history of diabetes, TG per increase of 0.56mM (50mg/dl), BMI, systolic blood pressure per income of 10 mmHg, age per 10-yr increment                                                                                                 | Elementary school:<br>High school:<br>Tertiary or above:                                                                                         | 1.52 (1.08,2.14)<br>1.42 (1.13,1.80)<br>1.00                                                                                                                                                             |  | p<0.001<br>p<0.001         |

|                        |                         |                                                                                                                       |                                                                          |                                                            |                                                           |                  |
|------------------------|-------------------------|-----------------------------------------------------------------------------------------------------------------------|--------------------------------------------------------------------------|------------------------------------------------------------|-----------------------------------------------------------|------------------|
| Zhang et al. 2013 [28] | School years completed  | Age, sex, cigarette smoking, alcohol drinking, physical inactivity, BMI, hypertension, and family history of diabetes | $\leq 6$ years:<br>7-9 years:<br>> 9 years:                              | Undiagnosed<br>0.73(0.51,1.03)<br>0.82 (0.59,1.16)<br>1.00 | Diagnosed<br>1.11 (0.80,1.53)<br>0.95 (0.70,1.28)<br>1.00 | No p-value       |
| Cai et al. 2011 [29]   | Highest level completed | Age, sex, current smokers, current drinkers, hypertension, overweight, central obesity, family history of diabetes    | Illiteracy:<br>Primary:<br>Middle or higher:                             | 1.00<br>0.81 (0.65,0.96)<br>0.73 (0.52,0.93)               |                                                           | p<0.05<br>p<0.05 |
| Tai et al. 1992 [50]   | Highest level completed | Age, sex, family income, exercise, physical activity, family history of diabetes and BMI                              | Illiterate:<br>Elementary and junior high school:<br>Senior high school: | 1.00<br>1.01<br>0.93                                       |                                                           | p>0.05<br>p>0.05 |
| Chou et al. 1994 [45]  | Highest level completed | Crude                                                                                                                 | Primary school and illiterate:<br>Junior high and above:                 | 1.00<br>0.39 (0.24,0.62)                                   |                                                           | No p-value       |

BMI - body mass index, WHR - waist-hip ratio, SEP - socioeconomic position, SEC - socioeconomic circumstances, TG - triglyceride

**Table S6: Findings of studies identified in systematic review reporting both prevalence and odds ratio of type 2 diabetes for different education groups in mainland China, Hong Kong and Taiwan**

| Study                | Education               | Outcome                                                                                                         | P-value                                 |
|----------------------|-------------------------|-----------------------------------------------------------------------------------------------------------------|-----------------------------------------|
| Fu et al. 2011 [30]  | School years completed  | Crude prevalence (95% CI, %)                                                                                    | No p-value, CI calculated from raw data |
|                      |                         | $\leq 9$ years:<br>> 9 years:                                                                                   |                                         |
|                      |                         | Odds ratio (95% CI) adjusted for age, sex, BMI, smoking alcohol drinking, and regular leisure physical activity | p=0.787                                 |
|                      |                         | $\leq 9$ years:<br>> 9 years:                                                                                   |                                         |
| Wei et al. 2010 [78] | Highest level completed | Crude prevalence (95% CI, %)                                                                                    | No p-value, CI calculated from raw data |
|                      |                         | Illiterate:<br>Semiliterate:<br>Primary:<br>Secondary:<br>College:                                              |                                         |
|                      |                         | 12.00 (4.60,19.40)<br>3.23 (0,9.55)<br>6.50 (2.12,10.88)<br>7.73 (5.49,9.98)<br>5.24 (2.66,7.83)                |                                         |

|                       |                         |                                                                                                                                                                                    |                                                                                                                                             |                                                                   |                                                                  |                                              |
|-----------------------|-------------------------|------------------------------------------------------------------------------------------------------------------------------------------------------------------------------------|---------------------------------------------------------------------------------------------------------------------------------------------|-------------------------------------------------------------------|------------------------------------------------------------------|----------------------------------------------|
|                       |                         | Odds ratio (95% CI) adjusted for age, gender, nationality, smoking history, alcohol consumption, marital status and family history of diabetes                                     | Illiterate: 1.00<br>Semiliterate: 0.25 (0.03,2.08)<br>Primary: 0.57 (0.20,1.58)<br>Secondary: 0.93 (0.39,2.23)<br>College: 0.62 (0.23,1.70) |                                                                   |                                                                  | p=0.1989<br>p=0.2779<br>p=0.8683<br>p=0.3521 |
| Zhou et al. 2009 [37] | Highest level completed | Crude prevalence (95% CI, %)                                                                                                                                                       |                                                                                                                                             | Men                                                               | Women                                                            | No p-value, CI calculated from raw data      |
|                       |                         |                                                                                                                                                                                    | Elementary-school/illiterate:<br>Secondary school:<br>College:                                                                              | 23.14 (15.59,30.69)<br>22.55 (18.92,26.18)<br>31.82 (23.84,39.79) | 31.19 (27.24,35.14)<br>16.15 (14.13,18.18)<br>10.42 (6.54,14.29) |                                              |
|                       |                         | Odds ratio (95% CI) adjusted for age and area                                                                                                                                      | Elementary-school/illiterate:<br>Secondary school:<br>College:                                                                              | 1.00<br>0.67 (0.43,1.03)<br>0.52 (0.28,0.96)                      | 1.00<br>1.30 (0.82, 2.06)<br>1.52 (0.91, 2.54)                   | No p-value                                   |
| Xu et al. 2006 [31]   | School years completed  | Crude prevalence (95% CI, %)                                                                                                                                                       | 0-9 years:<br>10-12 years:<br>≥13 years                                                                                                     | 1.52 (1.35,1.69)<br>1.86 (1.50,2.22)<br>3.80 (3.21,4.39)          |                                                                  | No p-value, CI calculated from raw data      |
|                       |                         | Odds ratio (95% CI) adjusted for age, gender, area of residence, BMI, occupation, smoking status, occupational physical activity, hospital category and health-care payment option | 0-9 years:<br>10-12 years:<br>≥13 years:                                                                                                    | 1.00<br>0.76 (0.59,0.99)<br>0.79 (0.62,1.02)                      |                                                                  | No p-value                                   |

BMI - body mass index

**Table S7: Findings of studies identified in systematic review reporting association between prevalence of type 2 diabetes and income in mainland China, Hong Kong and Taiwan**

| Study                  | Income                      | Adjustment                                                                                                                  | Prevalence (95% CI, %) |                     |       |                 | P-value                                            |            |
|------------------------|-----------------------------|-----------------------------------------------------------------------------------------------------------------------------|------------------------|---------------------|-------|-----------------|----------------------------------------------------|------------|
| Yu et al. 2015 [74]    | Family monthly income (¥)   | 6 <sup>th</sup> China national population census, Jilin Province population standardized (standardized for various factors) | <500:                  | 11.2 (10.0,12.4)    |       |                 | p<0.01 <sup>a</sup>                                |            |
|                        |                             |                                                                                                                             | 500-:                  | 9.5 (8.4,10.7)      |       |                 |                                                    |            |
|                        |                             |                                                                                                                             | 1000-:                 | 8.1 (7.3,9.0)       |       |                 |                                                    |            |
|                        |                             |                                                                                                                             | 2000-:                 | 6.2 (5.4,7.3)       |       |                 |                                                    |            |
|                        |                             |                                                                                                                             | 3000-:                 | 5.8 (4.5, 7.4)      |       |                 |                                                    |            |
| Xu et al. 2015 [52]    | Family yearly income (US\$) | 6 <sup>th</sup> China national population census age standardized                                                           | <800:                  | Total:              | Men   | Women           | p<0.05 <sup>b</sup> in all groups                  |            |
|                        |                             |                                                                                                                             | 800-1599:              | 4.1                 | 5.1   | 2.8             |                                                    |            |
|                        |                             |                                                                                                                             | ≥1600:                 | 5.4                 | 5.1   | 5.4             |                                                    |            |
|                        |                             |                                                                                                                             |                        | 11.3                | 14.2  | 8.8             |                                                    |            |
| Hu et al. 2009 [63]    | Personal yearly income (¥)  | 2000 China population census standardized (standardized for various factors)                                                | <1,500:                | 5.9                 |       |                 | p<0.01 <sup>a</sup>                                |            |
|                        |                             |                                                                                                                             | 1500-5999:             | 4.89                |       |                 |                                                    |            |
|                        |                             |                                                                                                                             | ≥6000:                 | 6.75                |       |                 |                                                    |            |
| Lin et al. 2011 [42]   | Family yearly income (US\$) | Crude                                                                                                                       | < 15,000:              | 16.53 (14.36,18.71) |       |                 | p<0.001 <sup>a</sup> , CI calculated from raw data |            |
|                        |                             |                                                                                                                             | 15,000-37,500:         | 8.63 (6.85,10.40)   |       |                 |                                                    |            |
|                        |                             |                                                                                                                             | > 37,500:              | 6.37 (3.34,9.40)    |       |                 |                                                    |            |
| Bragg et al. 2014 [35] | Family yearly income (¥)    | Age and study area structure of the study population standardized                                                           |                        | Self-reported       |       | Screen-detected |                                                    | No p-value |
|                        |                             |                                                                                                                             |                        | Men                 | Women | Men             | Women                                              |            |
|                        |                             |                                                                                                                             | < 2500:                | 2.4                 | 2.9   | 3.7             | 3.9                                                |            |
|                        |                             |                                                                                                                             | 2500-4999:             | 2.8                 | 3.1   | 3.1             | 3.0                                                |            |
|                        |                             |                                                                                                                             | 5000-9999:             | 2.8                 | 3.5   | 2.3             | 2.7                                                |            |
|                        |                             |                                                                                                                             | 10000-19999:           | 2.9                 | 3.3   | 2.6             | 3.0                                                |            |
|                        |                             |                                                                                                                             | 20000-34999:           | 3.1                 | 3.4   | 2.7             | 2.8                                                |            |
|                        |                             |                                                                                                                             | ≥35000:                | 3.8                 | 4.1   | 3.4             | 2.7                                                |            |

<sup>a</sup> p-value for Chi-square test.

<sup>b</sup> p-value for trend Chi-square test.

**Table S8: Findings of studies identified in systematic review reporting odds ratio of type 2 diabetes for different income groups in mainland China, Hong Kong and Taiwan**

| Study                  | Income                      | Adjustment                                                                                                                                                                                                                                | Odds ratio (95% CI)                |                  |                     |                   | P-value          |            |
|------------------------|-----------------------------|-------------------------------------------------------------------------------------------------------------------------------------------------------------------------------------------------------------------------------------------|------------------------------------|------------------|---------------------|-------------------|------------------|------------|
| Xue et al. 2015 [75]   | Family monthly income (¥)   | Age, BMI, sex, marital status, education, alcohol consumption, smoking, cardiometabolic parameters and uric acid levels                                                                                                                   | Per level (<999,1000-2999, ≥3000): |                  | 0.896 (0.790,1.015) |                   | p=0.085          |            |
| Wang et al. 2013 [77]  | Family yearly income (¥)    | Age, sex, education level, ethnicity, BMI, current smoking, current drinking, hypertensive, township mean yearly income, township percent primary education or higher, township population size, township percentage of ethnic minorities | Per 1000¥:                         |                  | 0.89 (0.83,0.97)    |                   | p=0.01           |            |
| Ning et al. 2009 [53]  | Personal monthly income (¥) | Age, waist circumference, family history of diabetes, hypertension, school years completed, socioeconomic status, occupation, current smoking, current drinking, leisure time physical activity, survey and resident districts            | Urban areas                        | Men              | Women               |                   | No p-value       |            |
|                        |                             |                                                                                                                                                                                                                                           | ≤600:                              | 1.00             | 1.00                |                   |                  |            |
|                        |                             |                                                                                                                                                                                                                                           | 601-999:                           | 1.29 (0.93,1.79) | 0.81 (0.64,1.01)    |                   |                  |            |
|                        |                             |                                                                                                                                                                                                                                           | 1000-1999:                         | 1.35 (0.93,1.95) | 0.92 (0.66,1.27)    |                   |                  |            |
|                        |                             |                                                                                                                                                                                                                                           | ≥2000:                             | 0.99 (0.61,1.59) | 0.61 (0.36,1.42)    |                   |                  |            |
|                        |                             |                                                                                                                                                                                                                                           | Rural areas                        | Men              | Women               |                   |                  |            |
|                        |                             |                                                                                                                                                                                                                                           | ≤600:                              | 1.00             | 1.00                |                   |                  |            |
|                        |                             |                                                                                                                                                                                                                                           | 601-999:                           | 1.37 (0.88,2.12) | 0.88 (0.60,1.30)    |                   |                  |            |
|                        |                             |                                                                                                                                                                                                                                           | 1000-1999:                         | 1.29 (0.81,2.04) | 1.15 (0.74,1.80)    |                   |                  |            |
|                        |                             |                                                                                                                                                                                                                                           | ≥2000:                             | 2.00 (1.15,3.48) | 1.17 (0.56,2.45)    |                   |                  |            |
| Zhang et al. 2013 [28] | Personal monthly income (¥) | Age, sex, cigarette smoking, alcohol drinking, physical inactivity, BMI, hypertension, and family history of diabetes                                                                                                                     | < 1000:                            | Undiagnosed      | Diagnosed           |                   | No p-value       |            |
|                        |                             |                                                                                                                                                                                                                                           | 1000-1999:                         | 4.50 (3.07,6.61) | 4.56 (3.20,6.48)    |                   |                  |            |
|                        |                             |                                                                                                                                                                                                                                           | ≥2000:                             | 1.39 (0.95,2.04) | 1.31 (0.92,1.86)    |                   |                  |            |
|                        |                             |                                                                                                                                                                                                                                           |                                    | 1.00             | 1.00                |                   |                  |            |
| Yan et al. 2012 [54]   | Family yearly income (¥)    | Crude                                                                                                                                                                                                                                     |                                    | Men              |                     | Women             |                  | No p-value |
|                        |                             |                                                                                                                                                                                                                                           |                                    | Aged 18-40       | Aged ≥40            | Aged 18-40        | Aged ≥40         |            |
|                        |                             |                                                                                                                                                                                                                                           | low:                               | 1.00             | 1.00                | 1.00              | 1.00             |            |
|                        |                             |                                                                                                                                                                                                                                           | Medium:                            | 0.59 (0.24,1.45) | 1.06 (0.77,1.46)    | 4.06 (0.47,34.84) | 0.67 (0.49,0.93) |            |
|                        |                             |                                                                                                                                                                                                                                           | High:                              | 0.86 (0.39,1.91) | 1.51 (1.12,2.04)    | 2.16 (0.22,20.84) | 0.88 (0.65,1.17) |            |
| Cai et al. 2011 [29]   | Family yearly income (US\$) | Age, sex, current smokers, current drinkers, hypertension,                                                                                                                                                                                | < 450:                             | 1.00             |                     |                   |                  | p>0.05     |
|                        |                             |                                                                                                                                                                                                                                           | 450-650:                           | 1.06 (0.81,1.46) |                     |                   |                  | p>0.05     |
|                        |                             |                                                                                                                                                                                                                                           |                                    | 1.22 (0.94,1.53) |                     |                   |                  |            |

|                           |                                     |                                                                                                    |                                   |                          |                  |
|---------------------------|-------------------------------------|----------------------------------------------------------------------------------------------------|-----------------------------------|--------------------------|------------------|
|                           |                                     | overweight, central obesity,<br>family history of diabetes                                         | > 650:                            |                          |                  |
| Pan et al. 1997 [64]      | Personal yearly income (¥)          | Age, sex, BMI, hypertension,<br>family history, labour, education                                  | <2500:<br>2500-5000:<br>>5000:    | 1.00<br>NA<br>1.48       | P=0.0001         |
| Tai et al. 1992 [50]      | Family monthly income<br>(Taiwan\$) | Age, sex, educational level,<br>exercise, physical activity, family<br>history of diabetes and BMI | 10000:<br>10001-20000:<br>>20000: | 1.00<br>1.13<br>0.89     | p<0.05<br>p>0.05 |
| Yu and Wong. 2004<br>[48] | Family monthly income<br>(HK\$)     | Age and sex                                                                                        | Low (<10,000):<br>High (≥10,000): | 2.01 (1.04,3.88)<br>1.00 | p<0.05           |

BMI - body mass index

**Table S9: Findings of studies identified in systematic review reporting both prevalence and odds ratio of type 2 diabetes for different income groups in mainland China, Hong Kong and Taiwan**

| Study                 | Income                      |                                                                                                                                                           | Outcome                                                                                                                                                                    | P-value                                 |
|-----------------------|-----------------------------|-----------------------------------------------------------------------------------------------------------------------------------------------------------|----------------------------------------------------------------------------------------------------------------------------------------------------------------------------|-----------------------------------------|
| Fu et al. 2011 [30]   | Family income               | Crude prevalence (95% CI, %)                                                                                                                              | Low: 3.0 (1.52,4.55)<br>Medium: 1.8 (1.37,2.24)<br>High: 2.6 (0.80,4.31)                                                                                                   | No p-value, CI calculated from raw data |
|                       |                             | Odds ratio (95% CI) adjusted for age, sex, BMI, smoking alcohol drinking, and regular leisure physical activity                                           | Low: 1.79 (0.98,3.27)<br>Medium: 1.00<br>High: 1.55 (0.72,3.34)                                                                                                            | p=0.058<br>p=0.261                      |
| Wei et al. 2010 [78]  | Family yearly income<br>(¥) | Crude prevalence (95% CI, %)                                                                                                                              | <10,000: 12.30 (7.58,17.02)<br>10,000-20,000: 5.61 (3.47,7.74)<br>20,000-30,000: 7.08 (4.28,9.89)<br>≥30,000: 4.00 (0.14,7.86)                                             | No p-value, CI calculated from raw data |
|                       |                             | Odds ratio (95% CI) adjusted for age, gender, nationality, education, smoking history, alcohol consumption, marital status and family history of diabetes | <10,000: 1.00<br>10,000-20,000: 0.44 (0.23,0.81)<br>20,000-30,000: 0.60 (0.31,1.17)<br>≥30,000: 0.32 (0.10,0.98)                                                           | p=0.0085<br>p=0.1337<br>p=0.0465        |
| Zhou et al. 2009 [37] | Family yearly income<br>(¥) | Crude prevalence (95% CI, %)                                                                                                                              | Men: 15.51 (10.31,20.71)<br>10,000-30,000: 23.17 (18.51,27.84)<br>>30,000: 31.97 (26.10,37.83)<br>Women: 19.69 (16.24,23.13)<br>19.03 (16.42,21.65)<br>18.91 (15.80,22.03) | No p-value, CI calculated from raw data |
|                       |                             | Odds ratio (95% CI) adjusted for age and area                                                                                                             | Men: 1.00<br>10,000-30,000: 1.50 (0.92,2.45)<br>>30,000: 2.11 (1.25,3.57)<br>Women: 1.00<br>0.90 (0.66,1.22)<br>0.80 (0.57,1.14)                                           | No p-value                              |

|                     |                                  |                                                                                                                                                                                               |                                                                                                                             |                                         |
|---------------------|----------------------------------|-----------------------------------------------------------------------------------------------------------------------------------------------------------------------------------------------|-----------------------------------------------------------------------------------------------------------------------------|-----------------------------------------|
| Wu et al. 2013 [46] | Family income quintile           | Crude prevalence (95% CI, %)                                                                                                                                                                  | Lowest: 2.9 (2.2,3.7)<br>Second: 5.2 (4.2,6.3)<br>Middle: 7.1 (5.7,8.7)<br>Fourth: 7.3 (6.0,8.8)<br>Highest: 9.3 (7.5,11.4) | No p-value                              |
|                     |                                  | Odds ratio (95% CI) adjusted for age, sex and urban/rural residence                                                                                                                           | Lowest: 1.00<br>Second: 1.9 (1.4,2.7)<br>Middle: 2.3 (1.7,3.3)<br>Fourth: 2.4 (1.6,3.6)<br>Highest: 2.5 (1.7,3.6)           | p<0.05<br>p<0.05<br>p<0.05<br>P<0.05    |
| Xu et al. 2006 [31] | Family per capita monthly income | Crude prevalence (95% CI, %)                                                                                                                                                                  | Lower: 0.41 (0.29,0.54)<br>Middle: 1.39 (1.15,1.63)<br>Higher: 3.67 (3.31,4.02)                                             | No p-value, CI calculated from raw data |
|                     |                                  | Odds ratio (95% CI) adjusted for age, gender, area of residence, BMI, education, occupation, smoking status, occupational physical activity, hospital category and health-care payment option | Lower: 1.00<br>Middle: 1.95 (1.27,2.99)<br>Higher: 2.88 (1.86,4.46)                                                         | No p-value                              |

BMI - body mass index

**Table S10: Findings of studies identified in systematic review reporting association between prevalence of type 2 diabetes and occupation in mainland China, Hong Kong and Taiwan**

| Study                | Adjustment                                                                                                                  |                | Prevalence (95% CI, %) | P-value                                 |
|----------------------|-----------------------------------------------------------------------------------------------------------------------------|----------------|------------------------|-----------------------------------------|
| Yu et al. 2015 [74]  | 6 <sup>th</sup> China national population census, Jilin Province population standardized (standardized for various factors) | Manual labour: | 7.1 (6.5,7.7)          | p<0.001 <sup>a</sup>                    |
|                      |                                                                                                                             | Mental labour: | 5.9 (5.1,6.9)          |                                         |
|                      |                                                                                                                             | Other:         | 13 (11.8,14.2)         |                                         |
| Hu et al. 2009 [63]  | 2000 China population census standardized (standardized for various factors)                                                | Professional:  | 5.95                   | p>0.05 <sup>a</sup>                     |
|                      |                                                                                                                             | Labourer:      | 5.4                    |                                         |
|                      |                                                                                                                             | Other:         | 5.68                   |                                         |
| Xia et al. 2013 [39] | Crude                                                                                                                       | Mental:        | 4.91 (4.26,5.57)       | No p-value, CI calculated from raw data |
|                      |                                                                                                                             | Non-mental:    | 5.51 (5.00,6.01)       |                                         |

<sup>a</sup> p-value for Chi-square test.

**Table S11: Findings of studies identified in systematic review reporting odds ratio of type 2 diabetes for different occupation groups in mainland China, Hong Kong and Taiwan**

| Study                        | Adjustment                                                                                                                                                                                                                                                            | Odds ratio (95% CI)                                                    |                   | P-value                    |            |
|------------------------------|-----------------------------------------------------------------------------------------------------------------------------------------------------------------------------------------------------------------------------------------------------------------------|------------------------------------------------------------------------|-------------------|----------------------------|------------|
| Kavikondala et al. 2011 [36] | Age, sex, study phase, WHR, BMI, maternal literacy by sex, maternal literacy by Childhood SEP and maternal literacy by early adult SEP                                                                                                                                | Low (agricultural worker, factory work or sales and service):          | 1.00              | No p-value                 |            |
|                              |                                                                                                                                                                                                                                                                       | High (administrator/manager, professional/technical, military/police): | 0.99 (0.75, 1.29) |                            |            |
| Ning et al. 2009 [53]        | Age, waist circumference, family history of diabetes, hypertension, personal income, School years completed, socioeconomic status, current smoking, current drinking, leisure time physical activity, survey and resident districts                                   | Urban areas                                                            | Men               | Women                      | No p-value |
|                              |                                                                                                                                                                                                                                                                       | Professional:                                                          | 1.00              | 1.00                       |            |
|                              |                                                                                                                                                                                                                                                                       | Not work outside the home:                                             | 1.07 (0.73,1.57)  | 1.48 (0.97,2.27)           |            |
|                              |                                                                                                                                                                                                                                                                       | Worker/farmer:                                                         | 0.90 (0.61,1.31)  | 1.21 (0.77,1.91)           |            |
|                              |                                                                                                                                                                                                                                                                       | Rural areas                                                            | Men               | Women                      |            |
|                              |                                                                                                                                                                                                                                                                       | Professional:                                                          | 1.00              | 1.00                       |            |
| Not work outside the home:   | 0.73 (0.39,1.37)                                                                                                                                                                                                                                                      | 0.66 (0.26,1.68)                                                       |                   |                            |            |
| Worker/farmer:               | 0.65 (0.38,1.10)                                                                                                                                                                                                                                                      | 0.72 (0.29,1.81)                                                       |                   |                            |            |
| Chen et al. 1999 [79]        | Age, sex                                                                                                                                                                                                                                                              | Unemployed:                                                            | 1.30 (0.92,1.82)  | p>0.05                     |            |
| Employed:                    | 1.00                                                                                                                                                                                                                                                                  |                                                                        |                   |                            |            |
| Zhou et al. 2015 [55]        | Region, urban SEC cross classification, sex/age cross classification, health literacy, time since health check, minor psychiatric morbidity, weight, number of unhealthy lifestyles, highest education qualification, economic status, couple status and living alone | Employed:                                                              | 1.00              | p<0.05<br>p<0.05<br>p<0.05 |            |
|                              |                                                                                                                                                                                                                                                                       | Housewife/husband:                                                     | 1.17 (1.08,1.28)  |                            |            |
|                              |                                                                                                                                                                                                                                                                       | Retired:                                                               | 1.34 (1.24,1.45)  |                            |            |
|                              |                                                                                                                                                                                                                                                                       | Unemployed/student/other:                                              | 1.17 (1.10,1.24)  |                            |            |
| Zhang et al. 2013 [28]       | Age, sex, cigarette smoking, alcohol drinking, physical inactivity, BMI, hypertension, and family history of diabetes                                                                                                                                                 | Retirement:                                                            | Undiagnosed       | Diagnosed                  | No p-value |
|                              |                                                                                                                                                                                                                                                                       | Unemployment:                                                          | 2.01 (1.40,2.89)  | 3.02 (2.12,4.22)           |            |
|                              |                                                                                                                                                                                                                                                                       | Non-manual work:                                                       | 0.83 (0.55,1.25)  | 1.25 (0.84,1.78)           |            |
|                              |                                                                                                                                                                                                                                                                       | Manual work:                                                           | 1.05 (0.70,1.55)  | 1.23 (0.82,1.80)           |            |
|                              |                                                                                                                                                                                                                                                                       |                                                                        | 1.00              | 1.00                       |            |

WHR - waist-hip ratio, BMI - body mass index, SEP - socioeconomic position, SEC - socioeconomic circumstances

**Table S12: Findings of studies identified in systematic review reporting both prevalence and odds ratio of type 2 diabetes for different occupation groups in mainland China, Hong Kong and Taiwan**

| Study                    | Outcome                                                                                                                                                                                                                                                                                                                                                                                                                                                                                                                            | P-value                                                                      |
|--------------------------|------------------------------------------------------------------------------------------------------------------------------------------------------------------------------------------------------------------------------------------------------------------------------------------------------------------------------------------------------------------------------------------------------------------------------------------------------------------------------------------------------------------------------------|------------------------------------------------------------------------------|
| Fu et al. 2011 [30]      | Crude prevalence (95% CI, %)<br>Farmer: 2.3 (1.77,2.80)<br>Not Farmer: 1.9 (1.15,2.65)                                                                                                                                                                                                                                                                                                                                                                                                                                             | No p-value, CI calculated from raw data                                      |
|                          | Odds ratio (95% CI) adjusted for age, sex, BMI, smoking alcohol drinking, and regular leisure physical activity<br>Farmer: 1.10 (0.66,1.84)<br>Not Farmer: 1.00                                                                                                                                                                                                                                                                                                                                                                    | p=0.723                                                                      |
| Zhou et al. 2009 [37]    | Crude prevalence (95% CI, %)<br>Worker/farmer: 21.20 (17.35,25.05)<br>Other: 27.60 (21.26,33.94)<br>Office working: 29.20 (21.56,36.84)                                                                                                                                                                                                                                                                                                                                                                                            | No p-value, CI calculated from raw data                                      |
|                          | Odds ratio (95% CI) adjusted for age and area<br>Men: 1.00<br>Women: 1.00<br>Worker/farmer: 1.00<br>Other: 1.21 (0.81,1.82)<br>Office working: 1.35 (0.85,2.12)                                                                                                                                                                                                                                                                                                                                                                    | No p-value                                                                   |
| Chen and Chen. 2012 [47] | Crude prevalence (%)<br>Professionals: 1.0<br>Senior officials and managers: 3.7<br>Clerks: 1.3<br>Salespersons, demonstrators and models: 3.3<br>Craft and related workers: 2.3<br>Plant and machine operators and assemblers: 3.5<br>Personal and protective services workers: 1.7<br>Elementary occupations: 3.6<br>Skilled agricultural and fishery workers: 3.9                                                                                                                                                               | No p-value                                                                   |
|                          | Odds ratio (95% CI) adjusted for age, sex, cigarette use, and alcohol use<br>Professionals: 1.00<br>Senior officials and managers: 1.79 (1.05,3.06)<br>Clerks: 1.48 (0.83,2.65)<br>Salespersons, demonstrators and models: 2.72 (1.45,5.11)<br>Craft and related workers: 1.70 (0.94,3.07)<br>Plant and machine operators and assemblers: 2.47 (1.38,4.39)<br>Personal and protective services workers: 1.38 (0.71,2.69)<br>Elementary occupations: 1.80 (0.89,3.63)<br>Skilled agricultural and fishery workers: 1.14 (0.60,2.17) | p<0.05<br>p>0.05<br>p<0.01<br>p>0.05<br>p<0.01<br>p>0.05<br>p>0.05<br>p>0.05 |
| Xu et al. 2006 [31]      | Crude prevalence (95% CI, %)<br>Blue Collar: 0.64 (0.51,0.76)<br>Service: 1.28 (0.92,1.64)<br>White Collar: 4.08 (3.70,4.47)                                                                                                                                                                                                                                                                                                                                                                                                       | No p-value, CI calculated from raw data                                      |
|                          | Odds ratio (95% CI) adjusted for age, gender, area of residence, BMI, education, smoking status, occupational physical activity, hospital category and health-care payment option<br>Blue Collar: 1.00<br>Service: 1.47 (0.99,2.18)<br>White Collar: 1.39 (1.05,1.85)                                                                                                                                                                                                                                                              | No p-value                                                                   |

BMI - body mass index
